# Supplementary material for: The first purely inorganic polyoxotungstates constructed from dimeric tungstoantimonate-based iron–rare-earth heterometallic fragments
Source: Royal Society of Chemistry journal article supplement (doi:10.1039/c5ce00633c), 2015-01-01
Supplement: c5ce00633c2.pdf [file c5ce00633c2.pdf]

# First purely inorganic polyoxotungstates constructed from dimeric tungstoantimonate-based iron–rare-earth heterometallic fragments

Lijuan Chen, Jing Cao, Xinghua Li, Xing Ma, Jie Luo,\* and Junwei Zhao\*

*Henan Key Laboratory of Polyoxometalate Chemistry, Institute of Molecular and Crystal Engineering, College of Chemistry and Chemical Engineering, Henan University, Kaifeng, Henan 475004, P. R. China. Email: luojie@henu.edu.cn, zhaojunwei@henu.edu.cn*

## Electronic Supplementary Information

**Table S1** Summary on the examples involving isomerization of  $[\text{B-}\alpha\text{-SbW}_9\text{O}_{33}]^{9-} \rightarrow [\text{B-}\beta\text{-SbW}_9\text{O}_{33}]^{9-}$

**Fig. S1.** IR spectra of **1–5** and  $\text{Na}_9[\text{B-}\alpha\text{-SbW}_9\text{O}_{33}] \cdot 19.5\text{H}_2\text{O}$  ( $\text{SbW}_9$ )

**Fig. S2** (a) Cyclic voltammogram of **2** (concentration:  $1.73 \times 10^{-4} \text{ mol}\cdot\text{L}^{-1}$ ) in  $0.5 \text{ mol}\cdot\text{L}^{-1} \text{ Na}_2\text{SO}_4 + \text{H}_2\text{SO}_4$  aqueous solution (pH = 1.58), scan rate:  $80 \text{ mV}\cdot\text{s}^{-1}$ . (b) Cyclic voltammograms at different scan rates: from inside to outside: 30, 40, 50, 70 and  $100 \text{ mV}\cdot\text{s}^{-1}$ .

**Table S2** The peak potentials for all the redox waves for **1** determined by CV in  $0.5 \text{ mol}\cdot\text{L}^{-1} \text{ H}_2\text{SO}_4 + \text{Na}_2\text{SO}_4$  aqueous solution at pH = 0.85, 1.44 and 2.20. The scan rate is  $30 \text{ mV}\cdot\text{s}^{-1}$ .

**Table S3** The peak potentials for all the redox waves determined by CV in  $0.5 \text{ mol}\cdot\text{L}^{-1} \text{ H}_2\text{SO}_4 + \text{Na}_2\text{SO}_4$  solution at pH = 0.91, 1.58 and 2.69 for **2**. The scan rate is  $80 \text{ mV}\cdot\text{s}^{-1}$

**Fig. S3.** The variation of the cathodic peak current ( $I'$ ) intensity as a function of the square root of the scan rate for **1** (a) and **2** (b).

**Fig. S4** (a) Cyclic voltammograms of **2** (concentration:  $1.47 \times 10^{-4} \text{ mol}\cdot\text{L}^{-1}$ ) at different pH values: pH = 2.69 (black), 1.58 (red), 0.91 (blue) in  $0.5 \text{ mol}\cdot\text{L}^{-1} \text{ Na}_2\text{SO}_4 + \text{H}_2\text{SO}_4$  aqueous solution. The scan rate is  $80 \text{ mV}\cdot\text{s}^{-1}$ .

**Fig. S5** (a) Cyclic voltammograms of **2** (concentrations:  $1.47 \times 10^{-4} \text{ mol}\cdot\text{L}^{-1}$ ) in pH = 1.58  $0.5 \text{ mol}\cdot\text{L}^{-1} \text{ Na}_2\text{SO}_4 + \text{H}_2\text{SO}_4$  aqueous solution with addition of various concentrations (a: 0, b:  $1 \times 10^{-5}$ , c:  $3 \times 10^{-5}$ , d:  $5 \times 10^{-5}$ , e:  $9 \times 10^{-5}$ , f:  $1.5 \times 10^{-4} \text{ mol}\cdot\text{L}^{-1}$ ) of  $\text{NaNO}_2$ . (b) Cyclic voltammograms of **2** (concentrations:  $1.47 \times 10^{-4} \text{ mol}\cdot\text{L}^{-1}$ ) in pH = 1.58  $0.5 \text{ mol}\cdot\text{L}^{-1} \text{ Na}_2\text{SO}_4 + \text{H}_2\text{SO}_4$  aqueous solution with addition of various concentrations (a: 0, b:  $1 \times 10^{-5}$ , c:  $2 \times 10^{-5}$ , d:  $3 \times 10^{-5}$ , e:  $4 \times 10^{-5}$ , f:  $5 \times 10^{-5} \text{ mol}\cdot\text{L}^{-1}$ ) of  $\text{NaBrO}_3$ .

**Table S4** The CAT values of **1** and **2** for the nitrite reduction.

**Table S5** The CAT values of **1** and **2** for the bromate reduction.

**Table S1 Summary on the examples involving isomerization of  $[\text{B-}\alpha\text{-SbW}_9\text{O}_{33}]^{9-} \rightarrow [\text{B-}\beta\text{-SbW}_9\text{O}_{33}]^{9-}$** 

| Public date | pH   | Synthetic method      | Reaction system                                                                                                                                            |
|-------------|------|-----------------------|------------------------------------------------------------------------------------------------------------------------------------------------------------|
| 2002        | 3.0  | Conventional solution | $[\text{Fe}_4(\text{H}_2\text{O})_{10}(\beta\text{-SbW}_9\text{O}_{33})_2]^{6-13}$                                                                         |
| 2008        | 2.0  | Conventional solution | $[\text{Fe}_4(\text{H}_2\text{O})_8(\beta\text{-SbW}_9\text{O}_{33})_2]^{6-32a}$                                                                           |
| 2008        | 3.0  | Conventional solution | $[\text{Fe}_4(\text{C}_2\text{O}_4)_4(\text{H}_2\text{O})_2(\beta\text{-SbW}_9\text{O}_{33})_2]^{14-32a}$                                                  |
| 2008        | 4.5  | Conventional solution | $[\text{Fe}_4(\text{C}_2\text{O}_4)_4(\beta\text{-SbW}_9\text{O}_{33})_2]^{14-32a}$                                                                        |
| 2009        | 6.0  | Conventional solution | $[\text{Sb}_2\text{W}_{20}\text{O}_{70}(\text{RuC}_6\text{H}_6)_2]_3^{10-8}$                                                                               |
| 2009        | 6.0  | Conventional solution | $[\text{Sb}_2\text{W}_{20}\text{O}_{70}(\text{RuC}_{10}\text{H}_{14})_2]_3^{10-8}$                                                                         |
| 2010        | 3.0  | Conventional solution | $[\{\text{Sn}(\text{CH}_3)_2\}_3(\text{H}_2\text{O})_4(\beta\text{-SbW}_9\text{O}_{33})]^{3-32b}$                                                          |
| 2011        | 5.53 | Conventional solution | $[\{\text{Co}(\text{H}_2\text{O})_3\}_2\text{Co}(\text{H}_2\text{O})_2\text{W}(\text{H}_2\text{O})_2(\text{B-}\beta\text{-SbW}_9\text{O}_{33})_2]^{6-32c}$ |
| 2011        | 5.50 | Conventional solution | $[\text{Mn}_{3.5}(\text{H}_2\text{O})_7\text{W}_{0.5}(\text{H}_2\text{O})(\text{B-}\beta\text{-SbW}_9\text{O}_{33})_2]^{8-32c}$                            |
| 2011        | 3.0  | Conventional solution | $[\{\text{Y}(\text{H}_2\text{O})_7\}_4\text{Sb}_2\text{W}_{22}\text{O}_{76}]^{2-31}$                                                                       |
| 2012        | 1.5  | Conventional solution | $[\{\text{Ru}^{\text{IV}}_4\text{O}_6(\text{H}_2\text{O})_9\}_2\text{Sb}_2\text{W}_{20}\text{O}_{68}(\text{OH})_2]^{4-10}$                                 |
| 2013        | 3.0  | Conventional solution | $[\text{Al}^{\text{III}}_4(\text{H}_2\text{O})_{10}(\beta\text{-SbW}_9\text{O}_{33}\text{H})_2]^{4-14}$                                                    |
| 2013        | 6.0  | Conventional solution | $[\text{Sb}_2\text{W}_{20}\text{O}_{70}\{\text{Mn}(\text{CO})_3\}_2]^{12-11}$                                                                              |
| 2013        | 3.0  | Conventional solution | $[\text{Ln}(\text{H}_2\text{O})_4\text{Sb}_2\text{W}_{21}\text{O}_{72}(\text{OH})]^{10-22}$                                                                |
| 2013        | 4.8  | Conventional solution | $[\text{Ln}_2(\text{H}_2\text{O})_8\text{Sb}_2\text{W}_{20}\text{O}_{70}]^{8-22}$                                                                          |

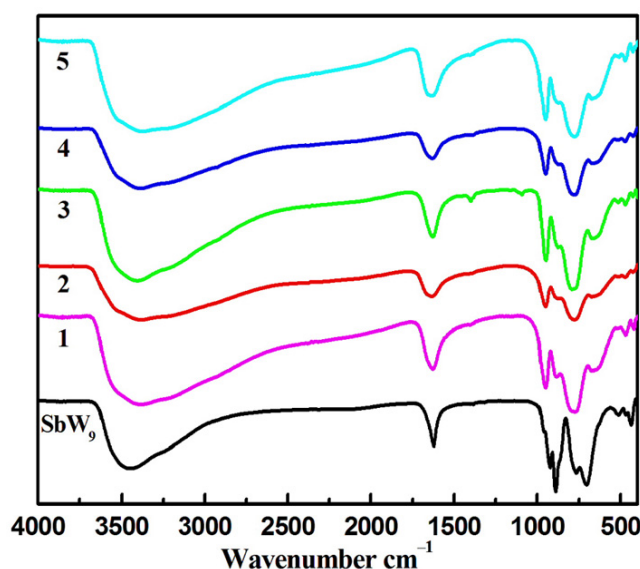**Fig. S1.** IR spectra of 1–5 and  $\text{Na}_9[\text{B-}\alpha\text{-SbW}_9\text{O}_{33}] \cdot 19.5\text{H}_2\text{O}$  ( $\text{SbW}_9$ )

### The discussion on electrochemical properties of 1 and 2:

Additionally, the influences of the scan rate on the electrochemical behaviors of **1** and **2** have been measured in the potential range of 0.9 to  $-0.8$  V in various scan rates in the aforementioned conditions (Fig. S2, S3b). It elucidates the variety of the cathodic and anodic peak currents of the  $\text{W}^{\text{VI}}$ -based wave with different scan rates, which unambiguously indicate that with increasing of the scan rate from 15 to 40  $\text{mV} \cdot \text{s}^{-1}$  for **1** and 30 to 100  $\text{mV} \cdot \text{s}^{-1}$  for **2**, the intensity of the

first W-based redox pair (I-I') gradually increases while the second  $W^{VI}$ -based redox couple (II-II') shows a weakened rising trend. It can be seen that with increasing of the scan rate, the cathodic peak potential gradually shifts to the negative direction whereas the corresponding anodic peak potential gradually move to the positive direction, as a consequence, the peak-to-peak separation between the according cathodic and anodic waves enlarges, but the locations of their mean waves are not significantly affected, that is to say that these peak positions almost no shifts in principle as described in the previous reported for other POMs.<sup>1</sup> Fig. S4 exhibits the variation of the peak current intensity of the W-based reduction wave (I') with the scan rate [for **1** the scan rate changing from 15 to 40  $mV \cdot s^{-1}$  and for **2** the scan rate changing between 30 and 100  $mV \cdot s^{-1}$ ]. The peak current intensity is proportional to the square root of the scan rate, enucleating a characteristic diffusion-controlled electron-transfer process under these scan rate conditions.<sup>2</sup> It is well-known that the reduction of POMs results in an accumulation of negative charge, which increases the basicity of the POA and the reduction process may be accompanied by concomitant protonation.<sup>3</sup> The influence of the variation of the pH of the supporting electrolyte on the electrochemical behavior of **1** and **2** have also been probed (Fig. S5, S6). It can be clearly seen that with increasing the pH, their entire cyclic voltammograms move toward the negative potential direction and peak currents gradually decrease (Tables S2, S3), which hints the important role of protons in the electrochemistry of POMs. This observation coincides with the previous reports.<sup>4</sup>

- 1 (a) Z. G. Han, Y. L. Zhao, J. Peng, Q. Liu and E. B. Wang, *Electrochim. Acta*, 2005, **51**, 218; (b) B. Keita, P. Mialane, F. Sécheresse, P. de Oliveira and L. Nadjo, *Electrochem. Commun.*, 2007, **9**, 164.
- 2 (a) X. L. Wang, Z. H. Kang, E. B. Wang and C. W. Hu, *Materials Letters*, 2002, **56**, 393; (b) M. Ibrahim, A. Haider, Y. h. Lan, B. S. Bassil, A. M. Carey, R. J. Liu, G. J. Zhang, B. Keita, W. H. Li, G. E. Kostakis, A. K. Powell and U. Kortz, *Inorg. Chem.*, 2014, **53**, 5179.
- 3 (a) M. Ammam and E. B. Easton, *Electrochim. Acta*, 2011, **56**, 2847; (b) B. Keita, K. Essaadi and L. Nadjo, *J. Electroanal. Chem. Interfacial Electrochem.* 1989, **259**, 127.
- 4 (a) B. Keita, Y. W. Lu, L. Nadjo and R. Contant, *Electrochem. Commun.*, 2000, **2**, 720; (b) M. Ibrahim, Y. X. Xiang, B. S. Bassil, Y. H. Lan, A. K. Powell, P. de Oliveira, B. Keita and U. Kortz, *Inorg. Chem.* 2013, **52**, 8399; (c) W. C. Chen, X. L. Wang, Y. Q. Jiao, P. Huang, E. L. Zhou, Z. M. Su and K. Z. Shao, *Inorg. Chem.*, 2014, **53**, 9486.

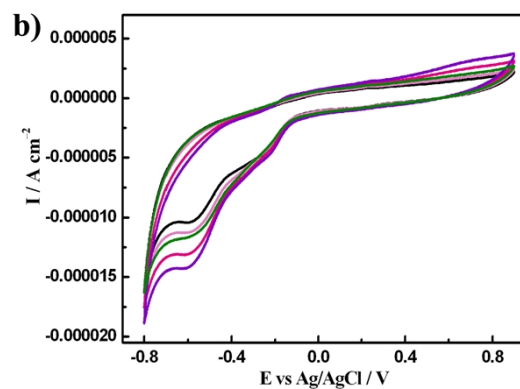

**Fig. S2** Cyclic voltammograms at different scan rates: from inside to outside: 15, 20, 25, 30 and 40  $\text{mV}\cdot\text{s}^{-1}$ .

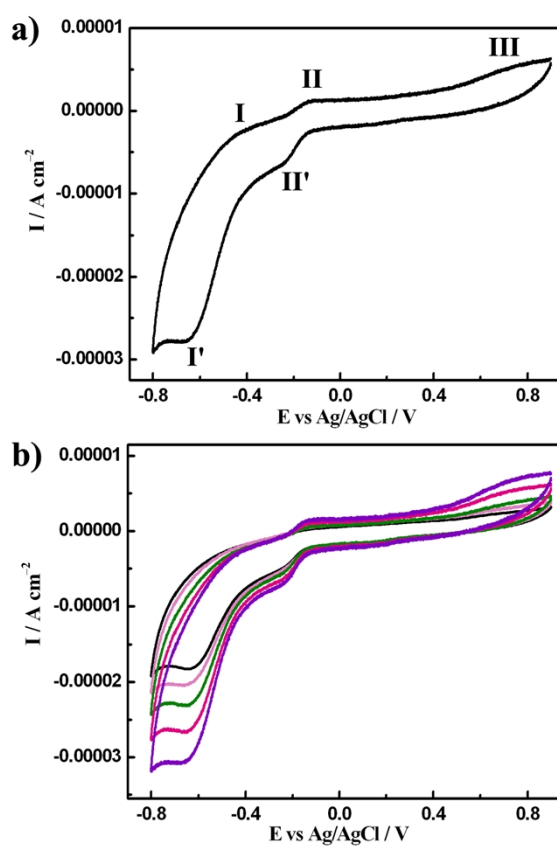

**Fig. S3** (a) Cyclic voltammogram of **2** (concentration:  $1.73 \times 10^{-4} \text{ mol}\cdot\text{L}^{-1}$ ) in  $0.5 \text{ mol}\cdot\text{L}^{-1} \text{ Na}_2\text{SO}_4 + \text{H}_2\text{SO}_4$  aqueous solution ( $\text{pH} = 1.58$ ). Scan rate:  $80 \text{ mV}\cdot\text{s}^{-1}$ . (b) Cyclic voltammograms at different scan rates: from inside to outside: 30, 40, 50, 70 and  $100 \text{ mV}\cdot\text{s}^{-1}$ .

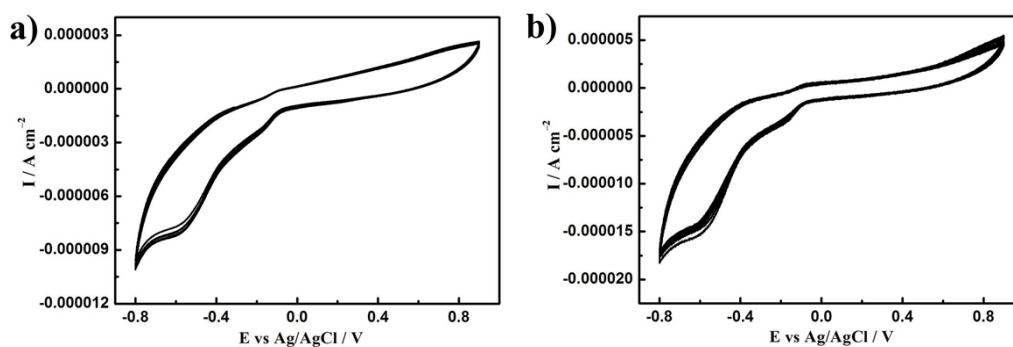

**Fig. S4** (a) Cyclic voltammograms of **1** (concentration:  $1.73 \times 10^{-4} \text{ mol}\cdot\text{L}^{-1}$ ) in  $0.5 \text{ mol}\cdot\text{L}^{-1} \text{ Na}_2\text{SO}_4 + \text{H}_2\text{SO}_4$  aqueous solution (pH = 1.44) for 10 cycles. Scan rate:  $30 \text{ mV}\cdot\text{s}^{-1}$ . (b) Cyclic voltammograms of **2** (concentration:  $1.47 \times 10^{-4} \text{ mol}\cdot\text{L}^{-1}$ ) in  $0.5 \text{ mol}\cdot\text{L}^{-1} \text{ Na}_2\text{SO}_4 + \text{H}_2\text{SO}_4$  aqueous solution (pH = 1.58) for 10 cycles. Scan rate:  $80 \text{ mV}\cdot\text{s}^{-1}$ .

**Table S2** The peak potentials for all the redox waves for **1** determined by CV in  $0.5 \text{ mol}\cdot\text{L}^{-1} \text{ H}_2\text{SO}_4 + \text{Na}_2\text{SO}_4$  aqueous solution at pH = 0.85, 1.44 and 2.20. Scan rate:  $30 \text{ mV}\cdot\text{s}^{-1}$ .

| pH   | $E_{pa}$ (V) | $E_{pc}$ (V) | $E_{1/2}$ (V) | $\Delta E_p$ (mV) |
|------|--------------|--------------|---------------|-------------------|
| 0.85 | -0.393       | -0.544       | -0.469        | 151               |
|      | -0.090       | -0.183       | -0.137        | 93                |
|      | 0.769        |              |               |                   |
| 1.44 | -0.486       | -0.646       | -0.566        | 178               |
|      | -0.147       | -0.247       | -0.197        | 100               |
|      | 0.749        |              |               |                   |
| 2.20 | -0.568       | -0.703       | -0.636        | 135               |
|      | -0.168       | -0.308       | -0.238        | 140               |
|      | 0.740        |              |               |                   |

**Table S3** The peak potentials for all the redox waves determined by CV in  $0.5 \text{ mol}\cdot\text{L}^{-1} \text{ H}_2\text{SO}_4 + \text{Na}_2\text{SO}_4$  solution at pH = 0.91, 1.58 and 2.69 for **2**. Scan rate:  $80 \text{ mV}\cdot\text{s}^{-1}$

| pH   | $E_{pa}$ (V) | $E_{pc}$ (V) | $E_{1/2}$ (V) | $\Delta E_p$ (mV) |
|------|--------------|--------------|---------------|-------------------|
| 0.91 | -0.362       | -0.586       | -0.474        | 224               |
|      | -0.109       | -0.187       | -0.148        | 78                |
|      | 0.781        |              |               |                   |
| 1.58 | -0.438       | -0.661       | -0.550        | 223               |
|      | -0.131       | -0.238       | -0.185        | 107               |
|      | 0.734        |              |               |                   |
| 2.69 | -0.543       | -0.755       | -0.649        | 212               |
|      | -0.194       | -0.379       | -0.287        | 185               |
|      | 0.728        |              |               |                   |

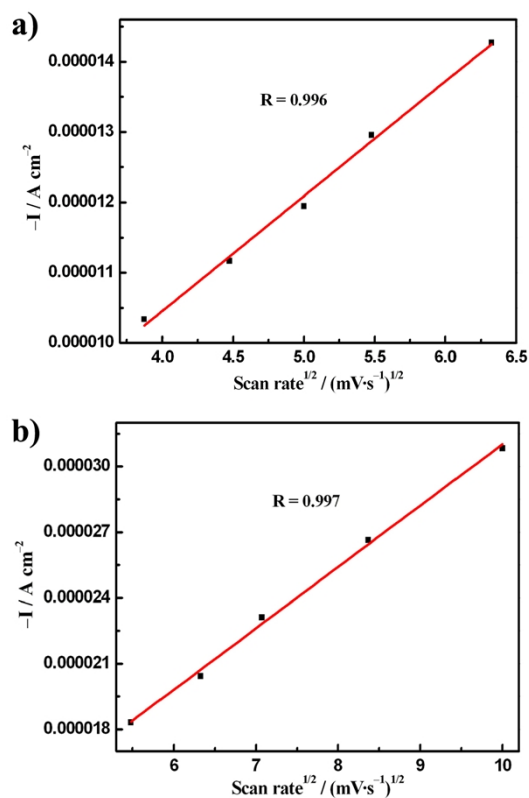

**Fig. S5** The variation of the cathodic peak current ( $I_p$ ) intensity as a function of the square root of the scan rate for **1** (a) and **2** (b).

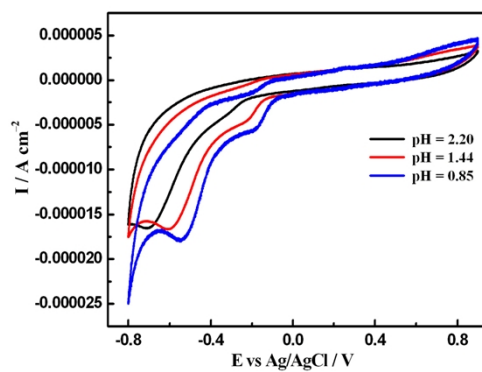

**Fig. S6** (a) Variation of cyclic voltammograms of **1** (concentration:  $1.73 \times 10^{-4} \text{ mol}\cdot\text{L}^{-1}$ ) at different pH values: pH = 2.20 (black), 1.44 (red), 0.85 (blue) in  $0.5 \text{ mol}\cdot\text{L}^{-1} \text{ Na}_2\text{SO}_4 + \text{H}_2\text{SO}_4$  aqueous solution. Scan rate:  $30 \text{ mV}\cdot\text{s}^{-1}$ .

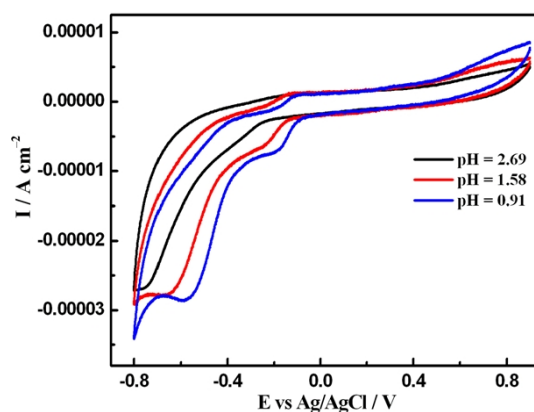

**Fig. S7** (a) Cyclic voltammograms of **2** (concentration:  $1.47 \times 10^{-4} \text{ mol}\cdot\text{L}^{-1}$ ) at different pH values: pH = 2.69 (black), 1.58 (red), 0.91 (blue) in  $0.5 \text{ mol}\cdot\text{L}^{-1} \text{ Na}_2\text{SO}_4 + \text{H}_2\text{SO}_4$  aqueous solution. Scan rate:  $80 \text{ mV}\cdot\text{s}^{-1}$ .

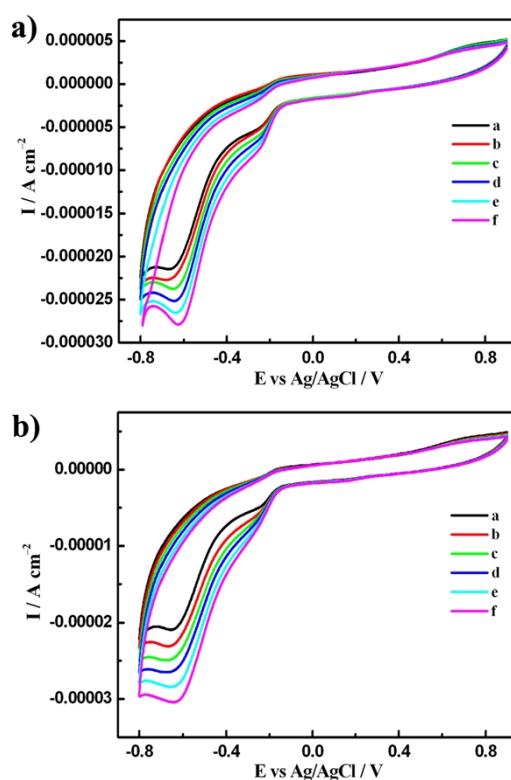

**Fig. S8** (a) Cyclic voltammograms of **2** (concentrations:  $1.47 \times 10^{-4} \text{ mol}\cdot\text{L}^{-1}$ ) in pH = 1.58  $0.5 \text{ mol}\cdot\text{L}^{-1} \text{ Na}_2\text{SO}_4 + \text{H}_2\text{SO}_4$  aqueous solution with addition of various concentrations of  $\text{NaNO}_2$  (a: 0, b:  $1 \times 10^{-5}$ , c:  $3 \times 10^{-5}$ , d:  $5 \times 10^{-5}$ , e:  $9 \times 10^{-5}$ , f:  $1.5 \times 10^{-4} \text{ mol}\cdot\text{L}^{-1}$ ). (b) Cyclic voltammograms of **2** (concentrations:  $1.47 \times 10^{-4} \text{ mol}\cdot\text{L}^{-1}$ ) in pH = 1.58  $0.5 \text{ mol}\cdot\text{L}^{-1} \text{ Na}_2\text{SO}_4 + \text{H}_2\text{SO}_4$  aqueous solution with addition of various concentrations of  $\text{NaBrO}_3$  (a: 0, b:  $1 \times 10^{-5}$ , c:  $2 \times 10^{-5}$ , d:  $3 \times 10^{-5}$ , e:  $4 \times 10^{-5}$ , f:  $5 \times 10^{-5} \text{ mol}\cdot\text{L}^{-1}$ ). Scan rate:  $80 \text{ mV}\cdot\text{s}^{-1}$ .

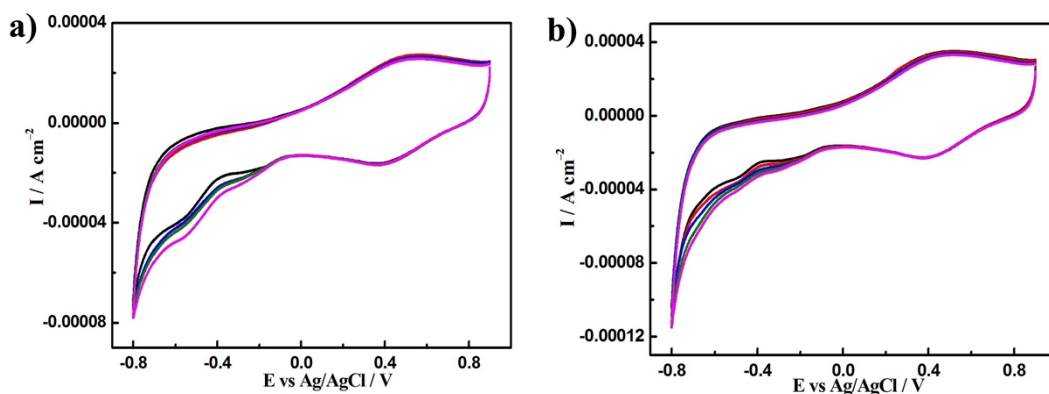

**Fig. S9** (a) Cyclic voltammograms of  $\text{Na}_9[\text{B-}\alpha\text{-SbW}_9\text{O}_{33}]\cdot 19.5\text{H}_2\text{O}$  (concentration:  $3.46 \times 10^{-4} \text{ mol}\cdot\text{L}^{-1}$ ) in  $\text{pH} = 1.50$   $0.5 \text{ mol}\cdot\text{L}^{-1} \text{ Na}_2\text{SO}_4 + \text{H}_2\text{SO}_4$  aqueous solution with addition of various concentrations of  $\text{NaNO}_2$  (a: 0, b:  $3 \times 10^{-5}$ , c:  $7 \times 10^{-5}$ , d:  $1.1 \times 10^{-4}$ , e:  $1.5 \times 10^{-4} \text{ mol}\cdot\text{L}^{-1}$ ). Scan rate:  $30 \text{ mV}\cdot\text{s}^{-1}$ . (b) Cyclic voltammograms of  $\text{Na}_9[\text{B-}\alpha\text{-SbW}_9\text{O}_{33}]\cdot 19.5\text{H}_2\text{O}$  (concentration:  $3.46 \times 10^{-4} \text{ mol}\cdot\text{L}^{-1}$ ) in  $\text{pH} = 1.50$   $0.5 \text{ mol}\cdot\text{L}^{-1} \text{ Na}_2\text{SO}_4 + \text{H}_2\text{SO}_4$  aqueous solution with addition of various concentrations of  $\text{NaBrO}_3$  (a: 0, b:  $1 \times 10^{-5}$ , c:  $4 \times 10^{-5}$ , d:  $7 \times 10^{-5}$ , e:  $9 \times 10^{-5}$ ). Scan rate:  $30 \text{ mV}\cdot\text{s}^{-1}$ .

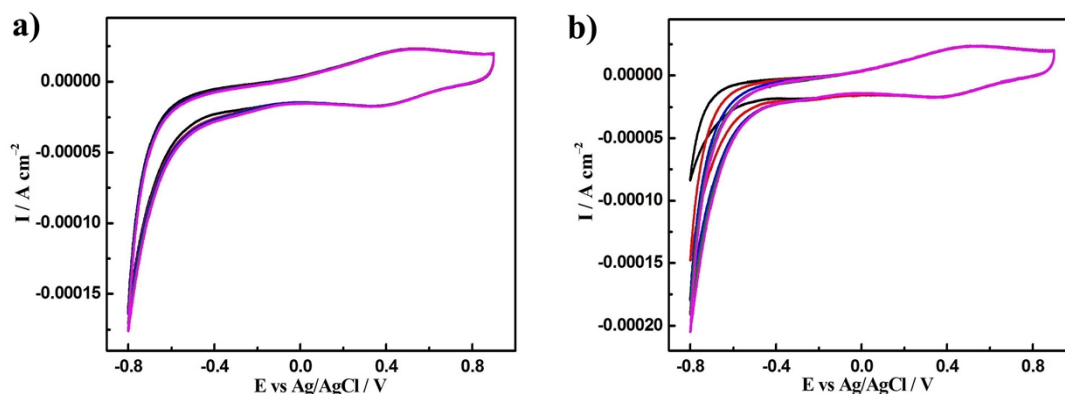

**Fig. S10** (a) Cyclic voltammograms of  $\text{FeCl}_3\cdot 6\text{H}_2\text{O}$  (concentration:  $6.92 \times 10^{-4} \text{ mol}\cdot\text{L}^{-1}$ ) in  $\text{pH} = 1.50$   $0.5 \text{ mol}\cdot\text{L}^{-1} \text{ Na}_2\text{SO}_4 + \text{H}_2\text{SO}_4$  aqueous solution with addition of various concentrations of  $\text{NaNO}_2$  (a: 0, b:  $3 \times 10^{-5}$ , c:  $7 \times 10^{-5}$ , d:  $1.1 \times 10^{-4}$ , e:  $1.5 \times 10^{-4} \text{ mol}\cdot\text{L}^{-1}$ ). Scan rate:  $30 \text{ mV}\cdot\text{s}^{-1}$ . (b) Cyclic voltammograms of  $\text{FeCl}_3\cdot 6\text{H}_2\text{O}$  (concentration:  $3.46 \times 10^{-4} \text{ mol}\cdot\text{L}^{-1}$ ) in  $\text{pH} = 1.50$   $0.5 \text{ mol}\cdot\text{L}^{-1} \text{ Na}_2\text{SO}_4 + \text{H}_2\text{SO}_4$  aqueous solution with addition of various concentrations of  $\text{NaBrO}_3$  (a: 0, b:  $1 \times 10^{-5}$ , c:  $3 \times 10^{-5}$ , d:  $7 \times 10^{-5}$ , e:  $1.3 \times 10^{-4}$ ). Scan rate:  $30 \text{ mV}\cdot\text{s}^{-1}$ .



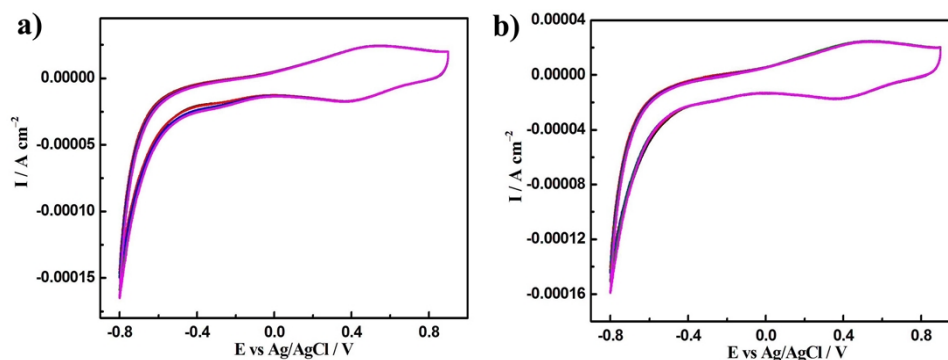

**Fig. S11** (a) Cyclic voltammograms of  $\text{PrCl}_3 \cdot 6\text{H}_2\text{O}$  (concentration:  $3.46 \times 10^{-4} \text{ mol} \cdot \text{L}^{-1}$ ) in  $\text{pH} = 1.50$   $0.5 \text{ mol} \cdot \text{L}^{-1}$   $\text{Na}_2\text{SO}_4 + \text{H}_2\text{SO}_4$  aqueous solution with addition of various concentrations of  $\text{NaNO}_2$  (a: 0, b:  $1 \times 10^{-5}$ , c:  $7 \times 10^{-5}$ , d:  $1.1 \times 10^{-4}$ , e:  $1.5 \times 10^{-4} \text{ mol} \cdot \text{L}^{-1}$ ). Scan rate:  $30 \text{ mV} \cdot \text{s}^{-1}$ . (b) Cyclic voltammograms of  $\text{PrCl}_3 \cdot 6\text{H}_2\text{O}$  (concentration:  $3.46 \times 10^{-4} \text{ mol} \cdot \text{L}^{-1}$ ) in  $\text{pH} = 1.50$   $0.5 \text{ mol} \cdot \text{L}^{-1}$   $\text{Na}_2\text{SO}_4 + \text{H}_2\text{SO}_4$  aqueous solution with addition of various concentrations of  $\text{NaBrO}_3$  (a: 0, b:  $1 \times 10^{-5}$ , c:  $5 \times 10^{-5}$ , d:  $9 \times 10^{-5}$ , e:  $1.3 \times 10^{-4}$ ). Scan rate:  $30 \text{ mV} \cdot \text{s}^{-1}$ .

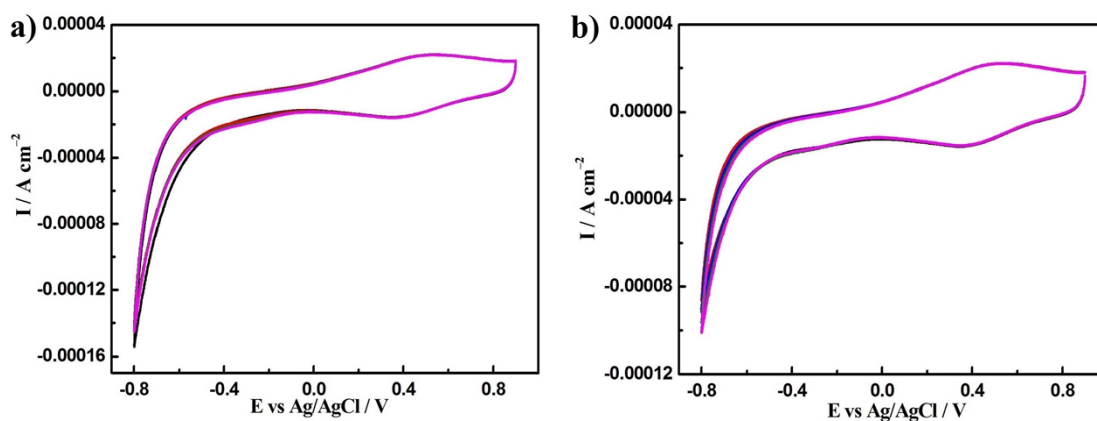

**Fig. S12** (a) Cyclic voltammograms of  $\text{TbCl}_3 \cdot 6\text{H}_2\text{O}$  (concentration:  $3.46 \times 10^{-4} \text{ mol} \cdot \text{L}^{-1}$ ) in  $\text{pH} = 1.50$   $0.5 \text{ mol} \cdot \text{L}^{-1}$   $\text{Na}_2\text{SO}_4 + \text{H}_2\text{SO}_4$  aqueous solution with addition of various concentrations of  $\text{NaNO}_2$  (a: 0, b:  $1 \times 10^{-5}$ , c:  $7 \times 10^{-5}$ , d:  $1.1 \times 10^{-4}$ , e:  $1.7 \times 10^{-4} \text{ mol} \cdot \text{L}^{-1}$ ). Scan rate:  $30 \text{ mV} \cdot \text{s}^{-1}$ . (b) Cyclic voltammograms of  $\text{TbCl}_3 \cdot 6\text{H}_2\text{O}$  (concentration:  $3.46 \times 10^{-4} \text{ mol} \cdot \text{L}^{-1}$ ) in  $\text{pH} = 1.50$   $0.5 \text{ mol} \cdot \text{L}^{-1}$   $\text{Na}_2\text{SO}_4 + \text{H}_2\text{SO}_4$  aqueous solution with addition of various concentrations of  $\text{NaBrO}_3$  (a: 0, b:  $1 \times 10^{-5}$ , c:  $7 \times 10^{-5}$ , d:  $1.1 \times 10^{-4}$ , e:  $1.7 \times 10^{-4}$ ). Scan rate:  $30 \text{ mV} \cdot \text{s}^{-1}$ .

**Table S4** The CAT values of 1 and 2 for the nitrite reduction.

| Substrate ( $\text{NaNO}_2 / \text{mol} \cdot \text{L}^{-1}$ ) | CAT for 1 (%) | CAT for 2 (%) |
|----------------------------------------------------------------|---------------|---------------|
| $1 \times 10^{-5}$                                             | 4.78          | 4.55          |
| $3 \times 10^{-5}$                                             | 12.07         | 9.89          |
| $1.5 \times 10^{-4}$                                           | 38.08         | 29.31         |

**Table S5** The CAT values of **1** and **2** for the bromate reduction.

| Substrate (NaBrO <sub>3</sub> / mol·L <sup>-1</sup> ) | CAT for <b>1</b> (%) | CAT for <b>2</b> (%) |
|-------------------------------------------------------|----------------------|----------------------|
| 1 × 10 <sup>-5</sup>                                  | 10.65                | 10.54                |
| 3 × 10 <sup>-5</sup>                                  | 29.54                | 26.31                |
| 5 × 10 <sup>-5</sup>                                  | 51.04                | 45.38                |
